# Supplementary material for: All-biomass-based eco-friendly waterproof coating for paper-based green packaging
Source: Royal Society of Chemistry journal article supplement (doi:10.1039/d2gc02265f), 2022-01-01
Supplement: d2gc02265f1.pdf [file d2gc02265f1.pdf]

# Supplementary information

## All-biomass-based Eco-friendly Waterproof Coating for Paper Based Green Packaging

Yuyuan Wang, Xiaoqian Zhang\*, Lijun Kan, Feng Shen, Hao Ling, Xiaohui Wang\*

*State Key Laboratory of Pulp and Paper Engineering, South China University of  
Technology, Guangzhou, 510640, China.*

---

\* Corresponding author. E-mail address: fewangxh@scut.edu.cn (X. H. Wang);  
zhangxq.163@163.com (X. Q. Zhang).

**Table S1.** The water barrier performance of H-LA-Wax coated paper compared with reported materials.

| <b>Materials</b>      |              | <b>WVTR</b><br>(g mm/m <sup>2</sup> /day) | <b>References</b> |
|-----------------------|--------------|-------------------------------------------|-------------------|
| Conventional plastics | LDPE         | 0.71 ± 0.12                               | 1                 |
|                       | PET          | 1.49 ± 0.11                               | 1                 |
|                       | Carnauba wax | 0.70 ± 2.8                                | 2                 |
|                       | Starch       | 34.15 ± 3.16                              | 2                 |
| Biopolymers coating   | Protein      | 29.93 ± 4.57                              | 2                 |
|                       | Pectin       | 140.14 ± 10.56                            | 2                 |
|                       | PLA          | 177.465 ± 12.67                           | 2                 |
| <b>H-LA-Wax</b>       |              | <b>5.05 ± 0.4</b>                         | <b>This work</b>  |

**Table S2.** Materials cost calculation.

| <b>Materials</b>  | <b>Price (\$/kg)</b> | <b>Quality (g/m<sup>2</sup>)</b> | <b>Cost (\$/m<sup>2</sup>)</b> |
|-------------------|----------------------|----------------------------------|--------------------------------|
| Beeswax           | 5.58                 | 7.6                              | 0.0056                         |
| Hemicellulose     | 1.24                 | 0.19                             | 0.0002                         |
| Lauric acid       | 1.70                 | 0.57                             | 0.0010                         |
| Others            |                      |                                  | 0.0015                         |
| <b>Total cost</b> |                      |                                  | <b>0.0083</b>                  |

### **Tape-peeling test**

The tape-peeling test was performed according to the reported method with some modifications<sup>3-5</sup>. The grid lines were drawn on the waterproof coating by a Cross-Cut Tester. The adhesive tape (3M, Scotch 600) was applied to the coating surface under a 100 g weight for 30 s, and then peeled off from the surface, which is one cycle. The water contact angle of the coating was measured after every 4 cycles of tape peeling.

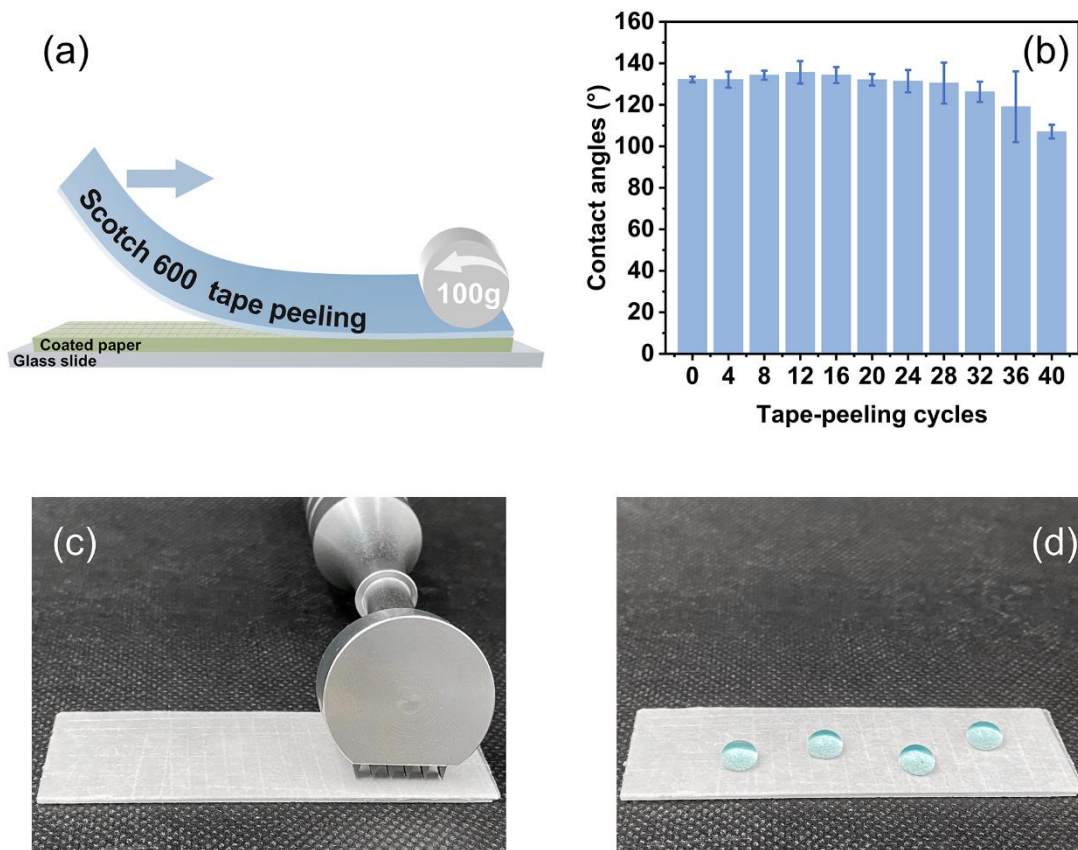

Fig. S1 (a) Schematic diagram of tape-peeling test; (b) Changes of water contact angles with different tape-peeling test cycles; (c) Scratching with a Cross-Cut Tester on the coated surface; (d) Surface hydrophobicity of the coated paper with 32 cycles tape-peeling test.

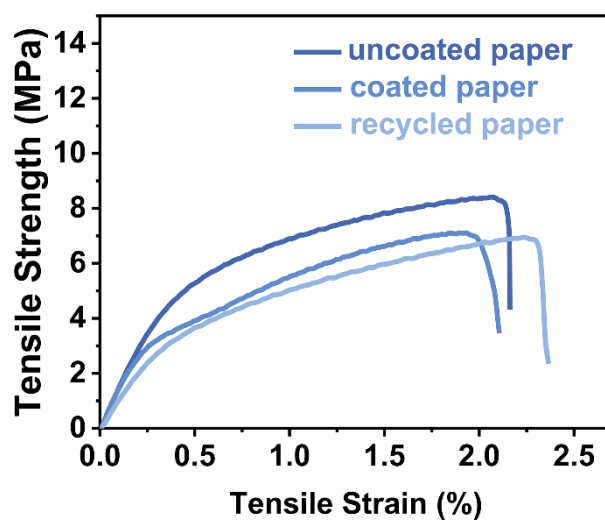

Fig. S2 The tensile stress-strain curves of the recycled paper.

## References

1. A. Sangroniz, J. B. Zhu, X. Tang, A. Etxeberria, E. Y. Chen and H. Sardon, *Nat Commun.*, 2019, **10**, 3559.
2. S. Jung, Y. Cui, M. Barnes, C. Satam, S. Zhang, R. A. Chowdhury, A. Adumbukulath, O. Sahin, C. Miller, S. M. Sajadi et al., *Adv. Mater.*, 2020, **32**, e1908291.
3. T. Zhu, Y. Cheng, J. Huang, J. Xiong, M. Ge, J. Mao, Z. Liu, X. Dong, Z. Chen and Y. Lai, *Chem. Eng. J.*, 2020, **399**, 125746.
4. C. Cao, B. Yi, J. Zhang, C. Hou, Z. Wang, G. Lu, X. Huang and X. Yao, *Chem. Eng. J.*, 2020, **392**, 124834.
5. B.-Y. Liu, C.-H. Xue, Q.-F. An, S.-T. Jia and M.-M. Xu, *Chem. Eng. J.*, 2019, **371**, 833-841.
